# Supplementary material for: The Mediating Role of Systemic Inflammation and Moderating Role of Race/Ethnicity in Racialized Disparities in Incident Dementia: A Decomposition Analysis
Source: Research Square preprint supplement (doi:10.21203/rs.3.rs-2753483/v1), 2023-04-05
Supplement: Supplementary file [file d85878059f77d6e7ace9042a.pdf]

**Supplemental Table 1:** Distribution of baseline characteristics between included and excluded participants in the United States Retirement Study

| Characteristic                              | Overall<br>N = 8,781 <sup>1</sup> | Included<br>N = 5,143 <sup>1</sup> | Excluded<br>N = 3,638 <sup>1</sup> | p-value <sup>2</sup> |
|---------------------------------------------|-----------------------------------|------------------------------------|------------------------------------|----------------------|
| <b>Cognitive Status</b>                     |                                   |                                    |                                    |                      |
| Incident dementia                           | 795 (15%)                         | 795 (15%)                          | NA                                 |                      |
| Cognitively normal                          | 4,348 (85%)                       | 4,348 (85%)                        | NA                                 |                      |
| <b>Baseline CRP</b> (μg/mL)                 | 4.55 (8.14)                       | 4.18 (7.70)                        | 5.09 (8.69)                        | <b>&lt;0.001</b>     |
| <b>Age</b> (years)                          | 68.12 (10.38)                     | 66.36 (9.90)                       | 70.60 (10.52)                      | <b>&lt;0.001</b>     |
| <b>Race</b>                                 |                                   |                                    |                                    | <b>&lt;0.001</b>     |
| Non-Hispanic Black                          | 1,057 (12%)                       | 488 (9.5%)                         | 569 (16%)                          |                      |
| Hispanic                                    | 794 (9.0%)                        | 376 (7.3%)                         | 418 (11%)                          |                      |
| Non-Hispanic Other                          | 189 (2.2%)                        | 0 (0%)                             | 189 (5.2%)                         |                      |
| Non-Hispanic White                          | 6,741 (77%)                       | 4,279 (83%)                        | 2,462 (68%)                        |                      |
| <b>Gender</b>                               |                                   |                                    |                                    | <b>&lt;0.001</b>     |
| Female                                      | 5,290 (60%)                       | 3,189 (62%)                        | 2,101 (58%)                        |                      |
| Male                                        | 3,491 (40%)                       | 1,954 (38%)                        | 1,537 (42%)                        |                      |
| <b>Education Category</b>                   |                                   |                                    |                                    | <b>&lt;0.001</b>     |
| > College                                   | 812 (9.2%)                        | 602 (12%)                          | 210 (5.8%)                         |                      |
| College/Some                                | 1,575 (18%)                       | 1,109 (22%)                        | 466 (13%)                          |                      |
| HS or <                                     | 6,394 (73%)                       | 3,432 (67%)                        | 2,962 (81%)                        |                      |
| <b>Alcohol</b> (# drinks/day when drinks)   | 0.70 (1.41)                       | 0.74 (1.27)                        | 0.64 (1.59)                        | <b>0.002</b>         |
| <b>Smoking</b>                              |                                   |                                    |                                    | <b>0.005</b>         |
| Current/Former                              | 4,950 (56%)                       | 2,835 (55%)                        | 2,115 (58%)                        |                      |
| Never                                       | 3,831 (44%)                       | 2,308 (45%)                        | 1,523 (42%)                        |                      |
| <b>Body Mass Index</b> (kg/m <sup>2</sup> ) | 28.33 (5.88)                      | 28.46 (5.75)                       | 28.16 (6.05)                       | <b>0.018</b>         |
| <b>Chronic Conditions</b>                   |                                   |                                    |                                    | <b>&lt;0.001</b>     |
| At least 1                                  | 7,465 (85%)                       | 4,223 (82%)                        | 3,242 (89%)                        |                      |
| No                                          | 1,316 (15%)                       | 920 (18%)                          | 396 (11%)                          |                      |
| <b>APOE-ε4</b>                              |                                   |                                    |                                    | 0.190                |
| At least 1                                  | 2,373 (27%)                       | 1,363 (27%)                        | 1,010 (28%)                        |                      |
| No copy                                     | 6,408 (73%)                       | 3,780 (73%)                        | 2,628 (72%)                        |                      |
| <b>Wave</b>                                 |                                   |                                    |                                    | <b>&lt;0.001</b>     |
| 2006                                        | 4,178 (48%)                       | 2,597 (50%)                        | 1,581 (43%)                        |                      |
| 2008                                        | 4,603 (52%)                       | 2,546 (50%)                        | 2,057 (57%)                        |                      |

<sup>1</sup>n (%); Mean (SD)

<sup>2</sup>Pearson's Chi-squared test; One-way ANOVA

CRP: C-reactive protein; APOE-ε4: apolipoprotein E ε4 allele carrier status

**Supplemental Table 2:** Distribution of baseline sample characteristics by racialized social groups in the Health and Retirement Study, 2006 and 2008

| Characteristic                            | Overall Sample<br>N = 5,143 <sup>1</sup> | Non-Hispanic Black<br>N = 488 <sup>1</sup> | Hispanic<br>N = 376 <sup>1</sup> | Non-Hispanic White<br>N = 4,279 <sup>1</sup> | p-value <sup>2</sup> |
|-------------------------------------------|------------------------------------------|--------------------------------------------|----------------------------------|----------------------------------------------|----------------------|
| <b>Dementia</b>                           |                                          |                                            |                                  |                                              | <b>&lt;0.001</b>     |
| Incident dementia                         | 795 (15%)                                | 171 (35%)                                  | 103 (27%)                        | 521 (12%)                                    |                      |
| Cognitively normal                        | 4,348 (85%)                              | 317 (65%)                                  | 273 (73%)                        | 3,758 (88%)                                  |                      |
| <b>Baseline CRP (μg/mL)</b>               | 4.18 (7.70)                              | 6.19 (11.15)                               | 4.32 (6.29)                      | 3.94 (7.28)                                  | <b>&lt;0.001</b>     |
| <b>Age (years)</b>                        | 66.36 (9.90)                             | 65.53 (9.68)                               | 63.63 (10.33)                    | 66.70 (9.85)                                 | <b>&lt;0.001</b>     |
| <b>Sex</b>                                |                                          |                                            |                                  |                                              | <b>0.002</b>         |
| Female                                    | 3,189 (62%)                              | 338 (69%)                                  | 232 (62%)                        | 2,619 (61%)                                  |                      |
| Male                                      | 1,954 (38%)                              | 150 (31%)                                  | 144 (38%)                        | 1,660 (39%)                                  |                      |
| <b>Educational Category</b>               |                                          |                                            |                                  |                                              | <b>&lt;0.001</b>     |
| > College                                 | 602 (12%)                                | 30 (6.1%)                                  | 11 (2.9%)                        | 561 (13%)                                    |                      |
| College/Some                              | 1,109 (22%)                              | 75 (15%)                                   | 45 (12%)                         | 989 (23%)                                    |                      |
| HS or <                                   | 3,432 (67%)                              | 383 (78%)                                  | 320 (85%)                        | 2,729 (64%)                                  |                      |
| <b>Alcohol (# drinks/day when drinks)</b> | 0.74 (1.27)                              | 0.48 (1.14)                                | 0.65 (1.41)                      | 0.77 (1.27)                                  | <b>&lt;0.001</b>     |
| <b>Smoking</b>                            |                                          |                                            |                                  |                                              | 0.496                |
| Current/Former                            | 2,835 (55%)                              | 279 (57%)                                  | 200 (53%)                        | 2,356 (55%)                                  |                      |
| Never                                     | 2,308 (45%)                              | 209 (43%)                                  | 176 (47%)                        | 1,923 (45%)                                  |                      |
| <b>Body Mass Index (kg/m<sup>2</sup>)</b> | 28.46 (5.75)                             | 30.69 (6.50)                               | 29.41 (5.50)                     | 28.12 (5.61)                                 | <b>&lt;0.001</b>     |
| <b>Chronic Conditions</b>                 |                                          |                                            |                                  |                                              | <b>&lt;0.001</b>     |
| At least 1                                | 4,223 (82%)                              | 432 (89%)                                  | 291 (77%)                        | 3,500 (82%)                                  |                      |
| No                                        | 920 (18%)                                | 56 (11%)                                   | 85 (23%)                         | 779 (18%)                                    |                      |
| <b>APOE-ε4</b>                            |                                          |                                            |                                  |                                              | <b>&lt;0.001</b>     |
| At least 1 copy                           | 1,363 (27%)                              | 185 (38%)                                  | 83 (22%)                         | 1,095 (26%)                                  |                      |
| No copy                                   | 3,780 (73%)                              | 303 (62%)                                  | 293 (78%)                        | 3,184 (74%)                                  |                      |
| <b>Time (years)</b>                       |                                          |                                            |                                  |                                              | <b>&lt;0.001</b>     |
| 2                                         | 302 (5.9%)                               | 80 (16%)                                   | 39 (10%)                         | 183 (4.3%)                                   |                      |
| 4                                         | 269 (5.2%)                               | 52 (11%)                                   | 37 (9.8%)                        | 180 (4.2%)                                   |                      |
| 6                                         | 4,572 (89%)                              | 356 (73%)                                  | 300 (80%)                        | 3,916 (92%)                                  |                      |

| Characteristic | Overall<br>Sample<br>N = 5,143 <sup>1</sup> | Non-Hispanic<br>Black<br>N = 488 <sup>1</sup> | Hispanic<br>N = 376 <sup>1</sup> | Non-Hispanic<br>White<br>N = 4,279 <sup>1</sup> | p-value <sup>2</sup> |
|----------------|---------------------------------------------|-----------------------------------------------|----------------------------------|-------------------------------------------------|----------------------|
| <b>Wave</b>    |                                             |                                               |                                  |                                                 | <b>0.017</b>         |
| 2006           | 2,597 (50%)                                 | 224 (46%)                                     | 174 (46%)                        | 2,199 (51%)                                     |                      |
| 2008           | 2,546 (50%)                                 | 264 (54%)                                     | 202 (54%)                        | 2,080 (49%)                                     |                      |

<sup>1</sup>n (%); Mean (SD)

<sup>2</sup>Pearson's Chi-squared test; One-way ANOVA

CRP: C-reactive protein; *APOE-ε4*: apolipoprotein E *ε4* allele carrier status

**Supplemental Table 3:** Baseline levels of C-reactive protein (CRP) by racialized social groups and sex in the United States Health and Retirement Study, waves 2006 & 2008

| <b>Race/ethnicity</b>     | <b>Sex</b>    | <b>Observations</b> | <b>Mean</b> | <b>SD</b> | <b>Min</b> | <b>Max</b> | <b>25<sup>th</sup></b> | <b>50<sup>th</sup></b> | <b>75<sup>th</sup></b> | <b>IQR</b> |
|---------------------------|---------------|---------------------|-------------|-----------|------------|------------|------------------------|------------------------|------------------------|------------|
| <b>Non-Hispanic Black</b> | <b>Female</b> | 338                 | 6.28        | 9.04      | 0.04       | 81.1       | 1.42                   | 3.60                   | 7.77                   | 6.34       |
| <b>Non-Hispanic Black</b> | <b>Male</b>   | 150                 | 6.00        | 14.9      | 0.03       | 125.0      | 1.14                   | 2.49                   | 5.86                   | 4.72       |
| <b>Hispanic</b>           | <b>Female</b> | 232                 | 4.61        | 5.59      | 0.08       | 37.9       | 1.40                   | 2.50                   | 5.79                   | 4.39       |
| <b>Hispanic</b>           | <b>Male</b>   | 144                 | 3.85        | 7.28      | 0.04       | 66.7       | 0.99                   | 1.89                   | 4.04                   | 3.06       |
| <b>Non-Hispanic White</b> | <b>Female</b> | 2619                | 4.27        | 7.57      | 0.04       | 173.0      | 1.01                   | 2.13                   | 4.91                   | 3.90       |
| <b>Non-Hispanic White</b> | <b>Male</b>   | 1660                | 3.40        | 6.77      | 0.02       | 121.0      | 0.79                   | 1.55                   | 3.30                   | 2.51       |

**Supplemental Table 4:** Distribution of baseline sample characteristics by percentiles of C-reactive protein, United States Health and Retirement Study, 2006 and 2008

| Characteristic                            | Overall<br>N = 5,143 <sup>1</sup> | C-reactive protein (µg/mL) percentiles                            |                                                                                                  |                                                                                                  |                                                                | p-value <sup>2</sup> |
|-------------------------------------------|-----------------------------------|-------------------------------------------------------------------|--------------------------------------------------------------------------------------------------|--------------------------------------------------------------------------------------------------|----------------------------------------------------------------|----------------------|
|                                           |                                   | 25 <sup>th</sup><br>( <b>&lt;0.96</b> )<br>N = 1,282 <sup>1</sup> | 25 <sup>th</sup> - 50 <sup>th</sup><br>( <b>≥0.96 &amp; &lt;1.97</b> )<br>N = 1,267 <sup>1</sup> | 50 <sup>th</sup> - 75 <sup>th</sup><br>( <b>≥1.97 &amp; &lt;4.57</b> )<br>N = 1,306 <sup>1</sup> | 75 <sup>th</sup><br>( <b>≥4.57</b> )<br>N = 1,288 <sup>1</sup> |                      |
| <b>Dementia Status</b>                    |                                   |                                                                   |                                                                                                  |                                                                                                  |                                                                | 0.115                |
| Incident dementia                         | 795 (15%)                         | 195 (15%)                                                         | 177 (14%)                                                                                        | 199 (15%)                                                                                        | 224 (17%)                                                      |                      |
| Cognitively normal                        | 4,348 (85%)                       | 1,087 (85%)                                                       | 1,090 (86%)                                                                                      | 1,107 (85%)                                                                                      | 1,064 (83%)                                                    |                      |
| <b>Age (years)</b>                        | 66.36 (9.90)                      | 66.35 (10.17)                                                     | 67.05 (9.77)                                                                                     | 66.60 (9.73)                                                                                     | 65.45 (9.88)                                                   | <b>&lt;0.001</b>     |
| <b>Race</b>                               |                                   |                                                                   |                                                                                                  |                                                                                                  |                                                                | <b>&lt;0.001</b>     |
| Non-Hispanic Black                        | 488 (9.5%)                        | 88 (6.9%)                                                         | 75 (5.9%)                                                                                        | 133 (10%)                                                                                        | 192 (15%)                                                      |                      |
| Hispanic                                  | 376 (7.3%)                        | 71 (5.5%)                                                         | 91 (7.2%)                                                                                        | 107 (8.2%)                                                                                       | 107 (8.3%)                                                     |                      |
| Non-Hispanic White                        | 4,279 (83%)                       | 1,123 (88%)                                                       | 1,101 (87%)                                                                                      | 1,066 (82%)                                                                                      | 989 (77%)                                                      |                      |
| <b>Sex</b>                                |                                   |                                                                   |                                                                                                  |                                                                                                  |                                                                | <b>&lt;0.001</b>     |
| Female                                    | 3,189 (62%)                       | 718 (56%)                                                         | 719 (57%)                                                                                        | 836 (64%)                                                                                        | 916 (71%)                                                      |                      |
| Male                                      | 1,954 (38%)                       | 564 (44%)                                                         | 548 (43%)                                                                                        | 470 (36%)                                                                                        | 372 (29%)                                                      |                      |
| <b>Educational Category</b>               |                                   |                                                                   |                                                                                                  |                                                                                                  |                                                                | <b>&lt;0.001</b>     |
| > College                                 | 602 (12%)                         | 221 (17%)                                                         | 148 (12%)                                                                                        | 124 (9.5%)                                                                                       | 109 (8.5%)                                                     |                      |
| College/Some                              | 1,109 (22%)                       | 297 (23%)                                                         | 308 (24%)                                                                                        | 261 (20%)                                                                                        | 243 (19%)                                                      |                      |
| HS or <                                   | 3,432 (67%)                       | 764 (60%)                                                         | 811 (64%)                                                                                        | 921 (71%)                                                                                        | 936 (73%)                                                      |                      |
| <b>Alcohol (# drinks/day when drinks)</b> | 0.74 (1.27)                       | 0.83 (1.27)                                                       | 0.81 (1.33)                                                                                      | 0.71 (1.26)                                                                                      | 0.60 (1.21)                                                    | <b>&lt;0.001</b>     |
| <b>Smoking Status</b>                     |                                   |                                                                   |                                                                                                  |                                                                                                  |                                                                | <b>&lt;0.001</b>     |
| Current/Former                            | 2,835 (55%)                       | 631 (49%)                                                         | 708 (56%)                                                                                        | 743 (57%)                                                                                        | 753 (58%)                                                      |                      |
| Never                                     | 2,308 (45%)                       | 651 (51%)                                                         | 559 (44%)                                                                                        | 563 (43%)                                                                                        | 535 (42%)                                                      |                      |
| <b>Body Mass Index (kg/m<sup>2</sup>)</b> | 28.46 (5.75)                      | 25.89 (4.30)                                                      | 27.48 (4.66)                                                                                     | 29.01 (5.34)                                                                                     | 31.40 (6.84)                                                   | <b>&lt;0.001</b>     |
| <b>Chronic Conditions</b>                 |                                   |                                                                   |                                                                                                  |                                                                                                  |                                                                | <b>&lt;0.001</b>     |
| At least 1                                | 4,223 (82%)                       | 972 (76%)                                                         | 1,008 (80%)                                                                                      | 1,114 (85%)                                                                                      | 1,129 (88%)                                                    |                      |

| Characteristic      | Overall<br>N = 5,143 <sup>1</sup> | C-reactive protein (μg/mL) percentiles                            |                                                                                                  |                                                                                                  |                                                                | p-value <sup>2</sup> |
|---------------------|-----------------------------------|-------------------------------------------------------------------|--------------------------------------------------------------------------------------------------|--------------------------------------------------------------------------------------------------|----------------------------------------------------------------|----------------------|
|                     |                                   | 25 <sup>th</sup><br>( <b>&lt;0.96</b> )<br>N = 1,282 <sup>1</sup> | 25 <sup>th</sup> - 50 <sup>th</sup><br>( <b>≥0.96 &amp; &lt;1.97</b> )<br>N = 1,267 <sup>1</sup> | 50 <sup>th</sup> - 75 <sup>th</sup><br>( <b>≥1.97 &amp; &lt;4.57</b> )<br>N = 1,306 <sup>1</sup> | 75 <sup>th</sup><br>( <b>≥4.57</b> )<br>N = 1,288 <sup>1</sup> |                      |
| No                  | 920 (18%)                         | 310 (24%)                                                         | 259 (20%)                                                                                        | 192 (15%)                                                                                        | 159 (12%)                                                      |                      |
| <b>APOE-ε4</b>      |                                   |                                                                   |                                                                                                  |                                                                                                  |                                                                | <b>&lt;0.001</b>     |
| At least 1 copy     | 1,363 (27%)                       | 447 (35%)                                                         | 347 (27%)                                                                                        | 301 (23%)                                                                                        | 268 (21%)                                                      |                      |
| No copy             | 3,780 (73%)                       | 835 (65%)                                                         | 920 (73%)                                                                                        | 1,005 (77%)                                                                                      | 1,020 (79%)                                                    |                      |
| <b>Time (years)</b> |                                   |                                                                   |                                                                                                  |                                                                                                  |                                                                | <b>0.009</b>         |
| 2                   | 302 (5.9%)                        | 58 (4.5%)                                                         | 80 (6.3%)                                                                                        | 68 (5.2%)                                                                                        | 96 (7.5%)                                                      |                      |
| 4                   | 269 (5.2%)                        | 71 (5.5%)                                                         | 51 (4.0%)                                                                                        | 80 (6.1%)                                                                                        | 67 (5.2%)                                                      |                      |
| 6                   | 4,572 (89%)                       | 1,153 (90%)                                                       | 1,136 (90%)                                                                                      | 1,158 (89%)                                                                                      | 1,125 (87%)                                                    |                      |
| <b>Wave</b>         |                                   |                                                                   |                                                                                                  |                                                                                                  |                                                                | 0.470                |
| 2006                | 2,597 (50%)                       | 659 (51%)                                                         | 640 (51%)                                                                                        | 636 (49%)                                                                                        | 662 (51%)                                                      |                      |
| 2008                | 2,546 (50%)                       | 623 (49%)                                                         | 627 (49%)                                                                                        | 670 (51%)                                                                                        | 626 (49%)                                                      |                      |

<sup>1</sup>n (%); Mean (SD)

<sup>2</sup>Pearson's Chi-squared test; One-way ANOVA

APOE-ε4: apolipoprotein E ε4 allele carrier status

**Supplemental Table 5:** Odds ratio of elevated levels of C-reactive protein ( $\geq 4.57 \mu\text{g/mL}$  or  $\geq 75^{\text{th}}$  percentile) stratified by minoritized status and racialized social groups in the US Health and Retirement Study, waves 2006 & 2008

|                                           | Non-Hispanic Black vs<br>non-Hispanic White <sup>1</sup><br>N = 4,767 |             | Hispanic vs<br>non-Hispanic White <sup>1</sup><br>N = 4,655 |             | Minoritized Racial Group vs<br>non-Hispanic White <sup>2</sup><br>N = 5,143 |             | + |
|-------------------------------------------|-----------------------------------------------------------------------|-------------|-------------------------------------------------------------|-------------|-----------------------------------------------------------------------------|-------------|---|
| <b>Models</b>                             |                                                                       |             |                                                             |             |                                                                             |             |   |
| <b>Unadjusted</b>                         | 2.16***                                                               | [1.78,2.62] | 1.32*                                                       | [1.05,1.67] | 1.76***                                                                     | [1.50,2.06] |   |
| <b>Demographic<sup>+</sup></b>            | 2.11***                                                               | [1.72,2.58] | 1.17                                                        | [0.92,1.49] | 1.66***                                                                     | [1.41,1.95] |   |
| <b>Risk Factors<sup>§</sup></b>           | 1.67***                                                               | [1.34,2.08] | 1.13                                                        | [0.87,1.46] | 1.42***                                                                     | [1.20,1.70] |   |
| <b>Chronic<br/>Conditions<sup>§</sup></b> | 1.66***                                                               | [1.33,2.07] | 1.14                                                        | [0.88,1.47] | 1.42***                                                                     | [1.20,1.70] |   |

Demographic model: adjusted for age, sex, education categories, *APOE-ε4* allele status, and wave

<sup>§</sup> Risk factors model: adjusted for age, sex, education categories, *APOE-ε4* allele status, wave, smoking status, alcohol consumption, body mass index

<sup>§</sup> Chronic conditions model: adjusted for age, sex, education categories, *APOE-ε4* allele status, wave, smoking status, alcohol consumption, body mass index, and chronic conditions

<sup>1</sup> Odds ratios, CI: confidence interval in brackets

<sup>2</sup> Odds ratios, CI: confidence intervals in brackets. Minoritized racial group: (non-Hispanic Black and Hispanic participants)

\*  $p < 0.05$ , \*\*  $p < 0.01$ , \*\*\*  $p < 0.001$

**Supplemental Table 6:** Randomized analogue mediation models for racial disparities in incident dementia using elevated levels of C-reactive protein (CRP  $\geq 4.57\mu\text{g/mL}$ ) as mediator. Models are stratified by minoritized status and racialized social groups in a sample of United States adults in the Health and Retirement Study

| Mediator (CRP)<br>Excess Risk | Minoritized Racial Group<br>vs non-Hispanic White<br>N = 5,143 |         |         |         | Randomized Analogue Model*<br>(Outcome: Incident Dementia)<br>non-Hispanic Black<br>vs non-Hispanic White<br>N = 4,767 |         |         |         | Hispanic<br>vs non-Hispanic White<br>N = 4,655 |         |         |         |
|-------------------------------|----------------------------------------------------------------|---------|---------|---------|------------------------------------------------------------------------------------------------------------------------|---------|---------|---------|------------------------------------------------|---------|---------|---------|
|                               | Estimate                                                       | [95%CI] | [95%CI] | p-value | Estimate                                                                                                               | [95%CI] | [95%CI] | p-value | Estimate                                       | [95%CI] | [95%CI] | p-value |
| RERI Controlled Direct Effect | 1.94                                                           | 1.58    | 2.44    | <0.00   | 2.57                                                                                                                   | 1.90    | 3.32    | <0.00   | 1.40                                           | 0.94    | 2.00    | <0.00   |
| RERI Interaction Reference    | 0.26                                                           | 0.04    | 0.52    | 0.02    | 0.18                                                                                                                   | -0.11   | 0.53    | 0.22    | 0.39                                           | 0.03    | 0.87    | 0.03    |
| RERI Interaction Mediation    | 0.06                                                           | -0.01   | 0.13    | 0.08    | 0.05                                                                                                                   | -0.03   | 0.21    | 0.23    | 0.01                                           | -0.09   | 0.14    | 0.68    |
| RERI Pure Indirect Effect     | 0.01                                                           | 0.00    | 0.02    | 0.12    | 0.01                                                                                                                   | 0.00    | 0.04    | 0.07    | 0.00                                           | -0.01   | 0.02    | 0.71    |
| <b>% Attributable</b>         |                                                                |         |         |         |                                                                                                                        |         |         |         |                                                |         |         |         |
| % Controlled Direct Effect    | 0.85                                                           | 0.75    | 0.97    | <0.00   | 0.91                                                                                                                   | 0.76    | 1.05    | <0.00   | 0.78                                           | 0.57    | 0.98    | <0.00   |
| % Interaction Reference       | 0.11                                                           | 0.02    | 0.22    | 0.02    | 0.06                                                                                                                   | -0.04   | 0.18    | 0.22    | 0.22                                           | 0.02    | 0.42    | 0.03    |
| % Interaction Mediation       | 0.03                                                           | 0.00    | 0.05    | 0.08    | 0.02                                                                                                                   | -0.01   | 0.07    | 0.23    | 0.00                                           | -0.05   | 0.07    | 0.68    |
| % Pure Indirect Effect        | 0.01                                                           | 0.00    | 0.01    | 0.12    | 0.00                                                                                                                   | 0.00    | 0.01    | 0.07    | 0.00                                           | -0.01   | 0.01    | 0.71    |
| Percent Mediated              | 0.03                                                           | 0.00    | 0.06    | 0.07    | 0.02                                                                                                                   | -0.01   | 0.08    | 0.13    | 0.01                                           | -0.05   | 0.07    | 0.68    |
| Percent due to Interaction    | 0.14                                                           | 0.02    | 0.25    | 0.02    | 0.08                                                                                                                   | -0.05   | 0.24    | 0.22    | 0.22                                           | 0.02    | 0.43    | 0.03    |
| Percent Eliminated            | 0.15                                                           | 0.03    | 0.25    | 0.01    | 0.09                                                                                                                   | -0.05   | 0.24    | 0.21    | 0.22                                           | 0.02    | 0.43    | 0.03    |

\*Model: outcome 6-year incident dementia, model adjusting for age, sex, education categories, wave, smoking status, alcohol consumption, body mass index, alcohol consumption, and chronic conditions, using *APOE-ε4* as variable affected by the race/ethnicity through ancestry. Minoritized racial group: (non-Hispanic Black and Hispanic participants)



**Supplemental Table 7A:** Meditational E-values for regression-based models; estimates are presented in the rate ratio scale. Models are stratified by racialized social groups in a sample of the United States adults in the Health and Retirement Study.

| <b>Minoritized vs non-Hispanic White*</b>        |                 |                 |                 |                |                   |                   |
|--------------------------------------------------|-----------------|-----------------|-----------------|----------------|-------------------|-------------------|
| <b>Rate Ratio Scale</b>                          | <b>Estimate</b> | <b>LB 95%CI</b> | <b>UB 95%CI</b> | <b>E-value</b> | <b>E-value LB</b> | <b>E-value UB</b> |
| Controlled direct effect (Rcde)                  | 2.99            | 2.58            | 3.50            | 5.43           | 4.61              | NA                |
| Pure natural direct effect (Rpnde)               | 3.13            | 2.75            | 3.58            | 5.71           | 4.95              | NA                |
| Total natural direct effect (Rtnde)              | 3.15            | 2.78            | 3.62            | 5.76           | 5.00              | NA                |
| Pure natural indirect effect (Rpnie)             | 1.01            | 1.00            | 1.02            | 1.09           | 1.00              | NA                |
| Total natural indirect effect (Rtnie)            | 1.02            | 1.00            | 1.04            | 1.14           | 1.05              | NA                |
| Total effect (Rte)                               | 3.17            | 2.79            | 3.66            | 5.80           | 5.03              | NA                |
| <b>non-Hispanic Black vs non-Hispanic White*</b> |                 |                 |                 |                |                   |                   |
|                                                  | <b>Estimate</b> | <b>LB 95%CI</b> | <b>UB 95%CI</b> | <b>E-value</b> | <b>E-value LB</b> | <b>E-value UB</b> |
| Controlled direct effect (Rcde)                  | 3.48            | 2.84            | 4.26            | 6.42           | 5.12              | NA                |
| Pure natural direct effect (Rpnde)               | 3.53            | 2.96            | 4.23            | 6.51           | 5.36              | NA                |
| Total natural direct effect (Rtnde)              | 3.54            | 2.98            | 4.25            | 6.54           | 5.41              | NA                |
| Pure natural indirect effect (Rpnie)             | 1.01            | 1.00            | 1.04            | 1.13           | 1.00              | NA                |
| Total natural indirect effect (Rtnie)            | 1.02            | 0.99            | 1.06            | 1.15           | 1.00              | NA                |
| Total effect (Rte)                               | 3.59            | 3.04            | 4.30            | 6.64           | 5.53              | NA                |
| <b>Hispanic vs non-Hispanic White*</b>           |                 |                 |                 |                |                   |                   |
|                                                  | <b>Estimate</b> | <b>LB 95%CI</b> | <b>UB 95%CI</b> | <b>E-value</b> | <b>E-value LB</b> | <b>E-value UB</b> |
| Controlled direct effect (Rcde)                  | 2.53            | 2.02            | 3.19            | 4.50           | 3.45              | NA                |
| Pure natural direct effect (Rpnde)               | 2.82            | 2.33            | 3.45            | 5.08           | 4.09              | NA                |
| Total natural direct effect (Rtnde)              | 2.81            | 2.35            | 3.46            | 5.06           | 4.13              | NA                |
| Pure natural indirect effect (Rpnie)             | 1.00            | 0.99            | 1.02            | 1.04           | NA                | 1.00              |
| Total natural indirect effect (Rtnie)            | 0.99            | 0.97            | 1.04            | 1.08           | NA                | 1.00              |
| Total effect (Rte)                               | 2.80            | 2.35            | 3.47            | 5.05           | 4.14              | NA                |

\* These E-values are on the rate ratio scale and correspond to the decomposition presented on Table 3

LB: Lower bound; UB: Upper bound

95%CI: 95% Confidence interval

NA: not applicable

**Supplemental Table 7B:** Meditational E-values for randomized analogue models; estimates are presented in the rate ratio scale. Models are stratified by racialized social groups in a sample of the United States adults in the Health and Retirement Study.

| Rate Ratio Scale                                    | Minoritized vs non-Hispanic White*        |          |          |         |            |            |
|-----------------------------------------------------|-------------------------------------------|----------|----------|---------|------------|------------|
|                                                     | Estimate                                  | LB 95%CI | UB 95%CI | E-value | E-value LB | E-value UB |
| Controlled direct effect (Rcde)                     | 3.03                                      | 2.65     | 3.58     | 5.51    | 4.74       | NA         |
| Pure natural direct effect (rRpnde) <sup>+</sup>    | 3.20                                      | 2.83     | 3.71     | 5.85    | 5.10       | NA         |
| Total natural direct effect (rRtnde) <sup>+</sup>   | 3.23                                      | 2.86     | 3.77     | 5.92    | 5.16       | NA         |
| Pure natural indirect effect (rRpnie) <sup>+</sup>  | 1.01                                      | 1.00     | 1.02     | 1.12    | 1.00       | NA         |
| Total natural indirect effect (rRtnie) <sup>+</sup> | 1.02                                      | 1.00     | 1.04     | 1.18    | 1.00       | NA         |
| Total effect (Rte)                                  | 3.27                                      | 2.88     | 3.80     | 6.00    | 5.21       | NA         |
|                                                     | non-Hispanic Black vs non-Hispanic White* |          |          |         |            |            |
|                                                     | Estimate                                  | LB 95%CI | UB 95%CI | E-value | E-value LB | E-value UB |
| Controlled direct effect (Rcde)                     | 3.69                                      | 2.99     | 4.50     | 6.85    | 5.43       | NA         |
| Pure natural direct effect (rRpnde) <sup>+</sup>    | 3.75                                      | 3.15     | 4.46     | 6.95    | 5.76       | NA         |
| Total natural direct effect (rRtnde) <sup>+</sup>   | 3.76                                      | 3.17     | 4.51     | 6.98    | 5.78       | NA         |
| Pure natural indirect effect (rRpnie) <sup>+</sup>  | 1.01                                      | 1.00     | 1.04     | 1.13    | 1.00       | NA         |
| Total natural indirect effect (rRtnie) <sup>+</sup> | 1.02                                      | 0.99     | 1.06     | 1.15    | 1.00       | NA         |
| Total effect (Rte)                                  | 3.81                                      | 3.22     | 4.56     | 7.09    | 5.90       | NA         |
|                                                     | Hispanic vs non-Hispanic White*           |          |          |         |            |            |
|                                                     | Estimate                                  | LB 95%CI | UB 95%CI | E-value | E-value LB | E-value UB |
| Controlled direct effect (Rcde)                     | 2.47                                      | 1.97     | 3.12     | 4.38    | 3.36       | NA         |
| Pure natural direct effect (rRpnde) <sup>+</sup>    | 2.79                                      | 2.32     | 3.48     | 5.03    | 4.08       | NA         |
| Total natural direct effect (rRtnde) <sup>+</sup>   | 2.80                                      | 2.33     | 3.50     | 5.04    | 4.09       | NA         |
| Pure natural indirect effect (rRpnie) <sup>+</sup>  | 1.00                                      | 0.99     | 1.02     | 1.01    | 1.00       | NA         |
| Total natural indirect effect (rRtnie) <sup>+</sup> | 1.00                                      | 0.97     | 1.05     | 1.06    | 1.00       | NA         |
| Total effect (Rte)                                  | 2.80                                      | 2.35     | 3.52     | 5.04    | 4.12       | NA         |

\* These E-values are on the rate ratio scale and correspond to the decomposition presented on Supplemental Table 6

+ Randomized analogue estimate

LB: Lower bound; UB: Upper bound

95%CI: 95% Confidence interval

NA: not applicable

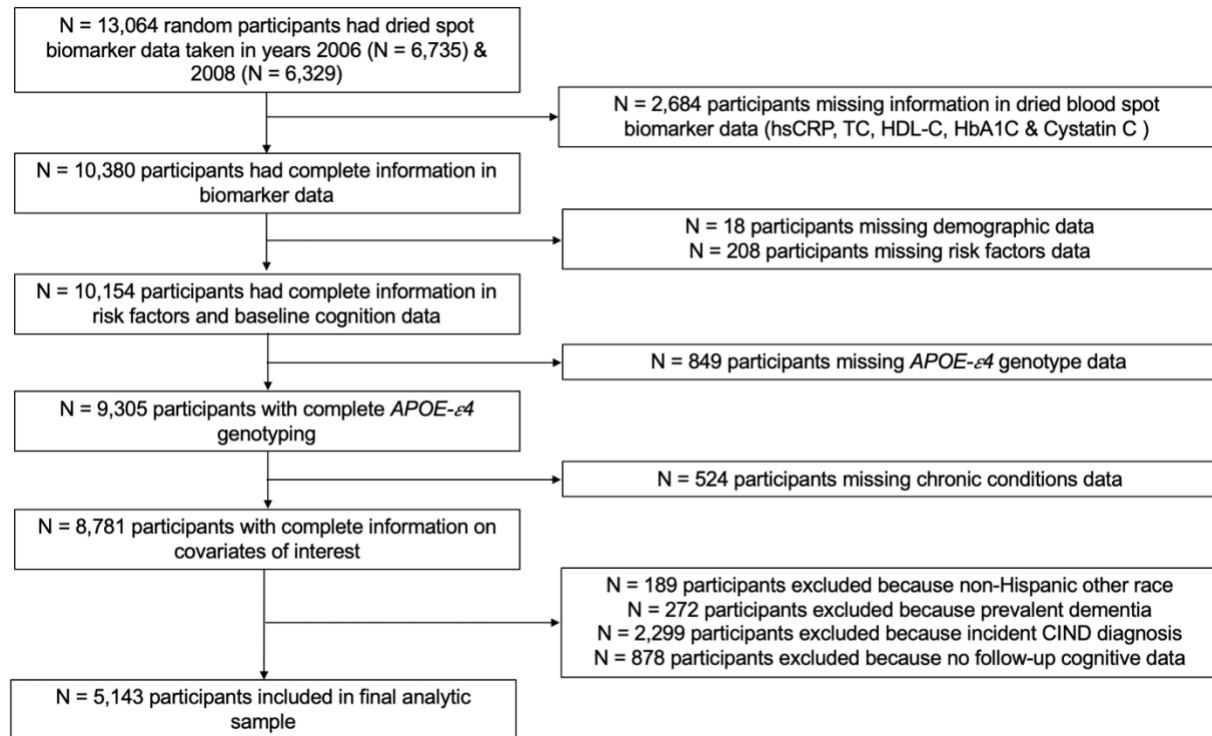

**Supplemental Figure 1:** Flow diagram of analytic sample study in the Health and Retirement Study. CRP: C-reactive protein, TC: total cholesterol; HDL-C: high density lipoprotein; HbA1C: glycosylated hemoglobin, *APOE-ε4*: apolipoprotein E  $\epsilon 4$  allele carrier status, CIND: cognitive impairment non-dementia.

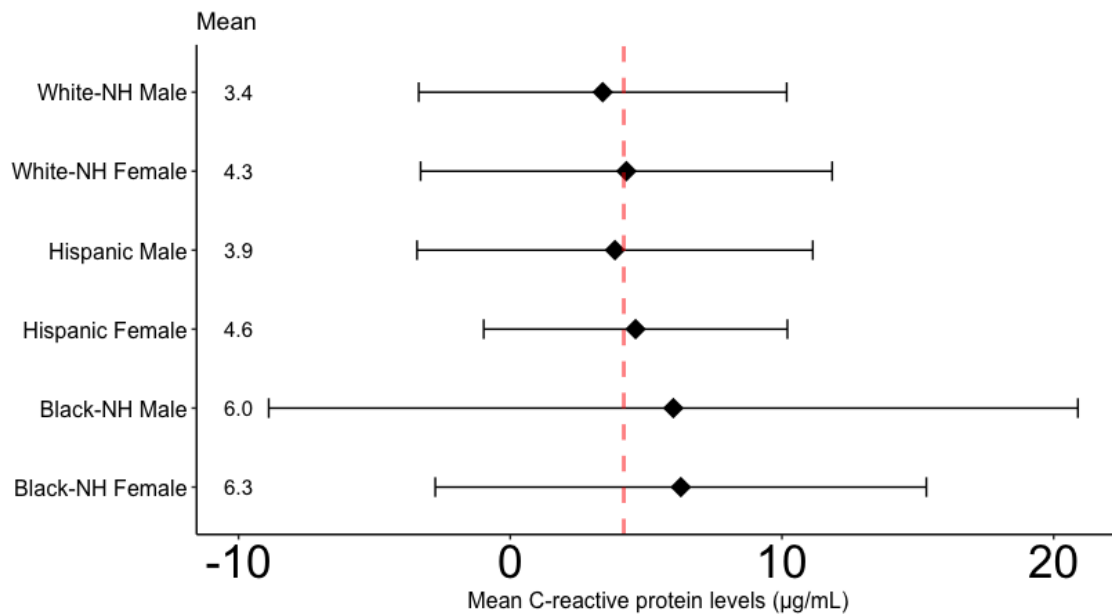

**Supplemental Figure 2:** Baseline C-reactive protein levels (µg/mL) by racialized social groups and sex in the United States Health and Retirement Study, waves 2006 & 2008. Dotted red line denotes the average levels of C-reactive protein in the overall sample (4.18µg/mL). White-NH: non-Hispanic White, Black-NH: non-Hispanic Black.

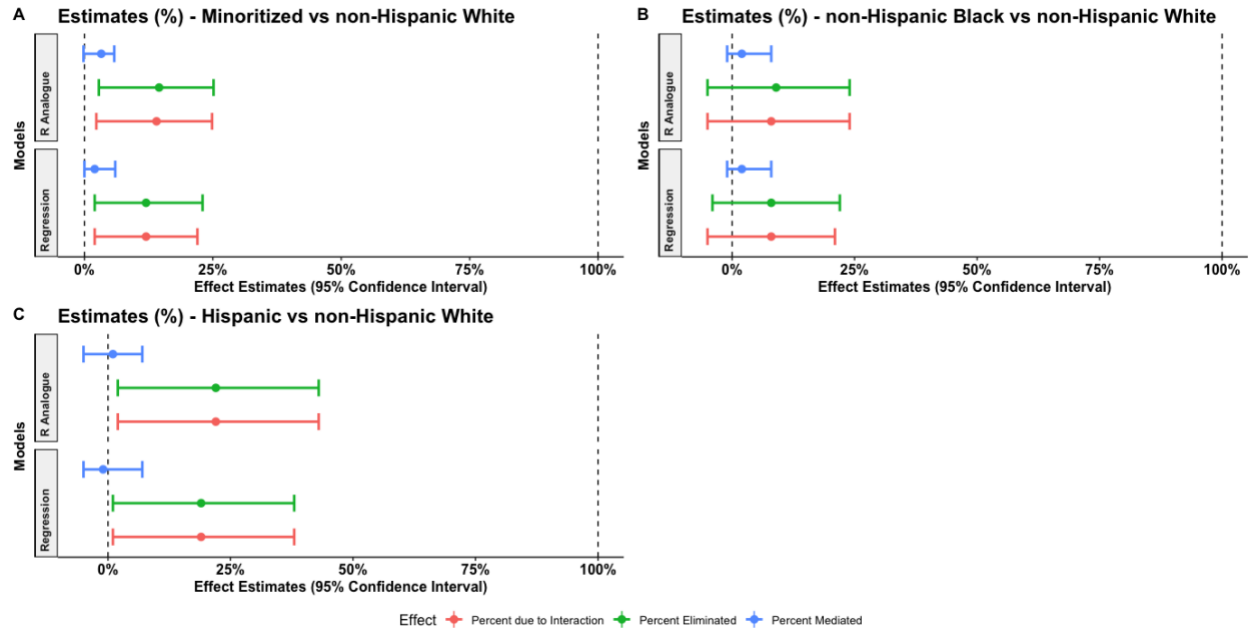

**Supplemental Figure 3:** Plot of mediation analysis estimates from regression-based and randomized analogue models denoting percent of the racial disparity in incident dementia that is due to the mediating effect of C-reactive protein, the percent due to the interaction between exposure and mediator, and the proportion eliminated. **A.** Mediation estimates from the racial disparity between the minoritized racial group (non-Hispanic Black and Hispanic) vs the non-Hispanic White group. **B.** Mediation estimates from the racial disparity between the non-Hispanic Black vs the non-Hispanic White group. **C.** Mediation estimates from the racial disparity between the Hispanic group vs the non-Hispanic White group.

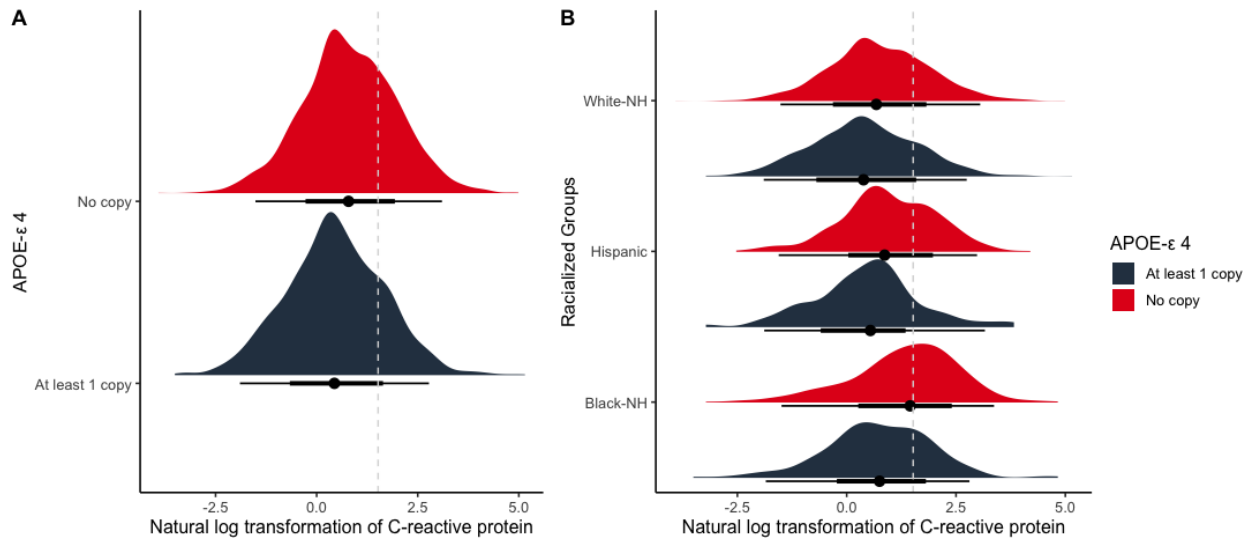

**Supplemental Figure 4:** Density plot of natural logarithmic transformation of C-reactive protein (CRP) in a selected sample of United States adults in the Health and Retirement Study.

**A.** Distribution of the natural logarithmic transformation of C-reactive protein (CRP) by *APOE-ε4* allele carrier status in our selected sample from the Health and Retirement Study (HRS). Dotted line denotes the cut off point for elevated levels of CRP at the 75th percentile ( $\geq 4.57\mu\text{g/mL}$ ).

**B.** Distribution of CRP by racialized groups and *APOE-ε4* allele carrier status. White-NH: non-Hispanic White, Black-NH: non-Hispanic Black.
